# Supplementary material for: AIMedGraph: a comprehensive multi-relational knowledge graph for precision medicine
Source: Oxford University Press journal article supplement (doi:10.1093/database/baad006), 2023-01-01
Supplement: baad006_supp.zip [file baad006_supp.zip]

Supplementary Table 1. Information recorded for disease, drug, clinical trial, gene, variant, supporting literature, and each type of relationship.

| Entity         | Category                | Attribute                       | Entity  | Category          | Attribute                |
|----------------|-------------------------|---------------------------------|---------|-------------------|--------------------------|
| Gene           | Summary                 | Gene name                       | Drug    | Summary           | Drug Name                |
|                |                         | Alias names                     |         |                   | Type                     |
|                |                         | Gene Description                |         |                   | Drug Synonyms            |
|                |                         | Clinical Trails                 |         |                   | Disease Name             |
|                | Basic Information       | Gene name                       |         | Basic Information | Drug Name                |
|                |                         | Synonyms                        |         |                   | Drug Synonyms            |
|                |                         | Gene Description                |         |                   | Trade name               |
|                |                         | HG Position (Assembly Position) |         |                   | Target                   |
|                |                         | Is Oncogene                     |         |                   | Indication               |
|                |                         | Is Tumor Suppressor Gene        |         |                   | FDA Approved Indication  |
|                |                         | External IDs                    |         |                   | NMPA Approved Indication |
|                | Related Clinical Trials | Official Title                  |         |                   | Drug Type                |
|                |                         | Offical Number                  |         |                   | Drug instruction         |
|                |                         | Study Phase                     |         |                   | Chemical structure       |
|                |                         | Disease                         |         |                   | Weight                   |
| Variant        | Summary                 | Gene name                       |         |                   | Chemical Formula         |
|                |                         | HGVSc                           |         | Pharmacology      | Mechanism of Action      |
|                |                         | Protein.Change                  |         |                   | Metabolism               |
|                |                         | Gene Location                   |         |                   | Toxicity                 |
|                |                         | SIFT Prediction                 |         |                   | Adverse Effects          |
|                |                         | Associated cancer types         |         | Drug Interaction  | Interacting Drugs        |
|                |                         | Associated drugs                |         |                   | Interacting Effect       |
|                |                         | Clinical evidence               |         | Pharmacogenomics  | Interacting Gene/Enzyme  |
|                |                         | Reference                       |         |                   | Allele Name              |
|                | Basic Information       | Genome Sequence Change          |         |                   | Gene Name                |
|                |                         | Coding Sequence Change          |         |                   | Genotype                 |
|                |                         | Amino Acid Change               |         |                   | Nucleic Acid Change      |
|                |                         | Gene Location                   |         |                   | Type                     |
|                |                         | Affected Exon Number            |         |                   | UniProt ID               |
|                |                         | Variant.Type                    |         |                   | Description              |
|                |                         | SIFT Prediction                 |         |                   | References               |
|                | Clinical Impact         | Clinical Impact Category        | Disease | Summary           | Associated Genes         |
|                |                         | Clinical effect                 |         |                   | Clinical Trails          |
|                |                         | Evidence level                  |         |                   | Associated Drugs         |
|                |                         | Associated disease              |         |                   | Disease Description      |
|                |                         | Associated drugs                |         |                   | Reference                |
|                |                         | Clinical annotation             |         | Basic Information | Disease Description      |
|                |                         | Reference                       |         |                   | disease name             |
|                |                         |                                 |         |                   | Gene name                |
|                |                         |                                 |         |                   | Alterations              |
| Clinical Trial | Basic Information       | Official Number                 |         |                   |                          |
|                |                         | Related Conditions              |         |                   |                          |

|           |                      |                   |                            |                   |                     |
|-----------|----------------------|-------------------|----------------------------|-------------------|---------------------|
| Reference |                      | Recruiting Status | Clinical<br>Interpretation | Basic Information | Efficacy            |
|           |                      | Study Phase       |                            |                   | Level of Evidence   |
|           | Basic<br>Information | DOI               |                            |                   | Clinical Annotation |
|           |                      | Author            |                            |                   |                     |
|           |                      | Journal           |                            |                   |                     |
|           |                      |                   |                            |                   |                     |
